# Supplementary material
Source: MDPI journal article supplement (https://www.mdpi.com/2072-4292/6/5/3822)
Supplement: s1 [file s1]

*Supplementary Information***Surface Temperatures at the Continental Scale: Tracking Changes with Remote Sensing at Unprecedented Detail. *Remote Sensing*, 2014, 6, 3822-3840****Markus Metz \*, Duccio Rocchini and Markus Neteler**

GIS and Remote Sensing Unit, Biodiversity and Molecular Ecology Department,  
Research and Innovation Centre, Fondazione Edmund Mach, Via E. Mach 1,  
38010 S. Michele all'Adige (TN), Italy; E-Mails: [duccio.rocchini@fmach.it](mailto:duccio.rocchini@fmach.it) (D.R.);  
[markus.neteler@fmach.it](mailto:markus.neteler@fmach.it) (M.N.)

\* Author to whom correspondence should be addressed; E-Mail: [markus.metz@fmach.it](mailto:markus.metz@fmach.it);  
Tel.: +39-461-615-570; Fax: +39-461-650-956.

**Figure S1.** Area of LST reconstruction. The area was covered by 18 MODIS tiles (dotted lines). The deformation of the MODIS tiles after reprojection applies correspondingly to the MODIS pixels.

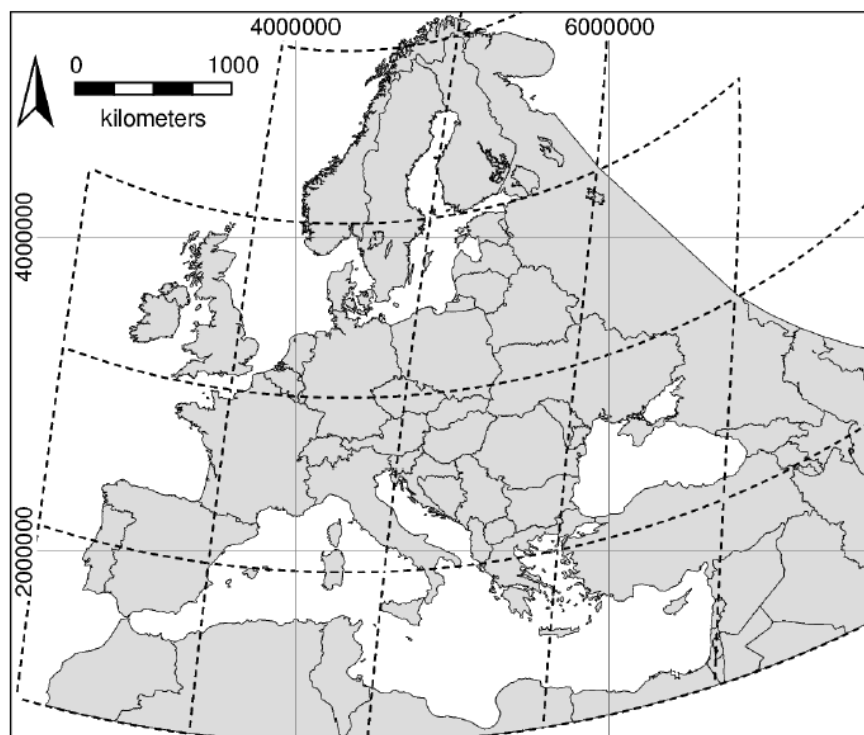

**Figure S2.** Illustration of the grid shift by reprojection. The sinusoidal MODIS grid (green) is shifted after reprojection to EPSG:3035.

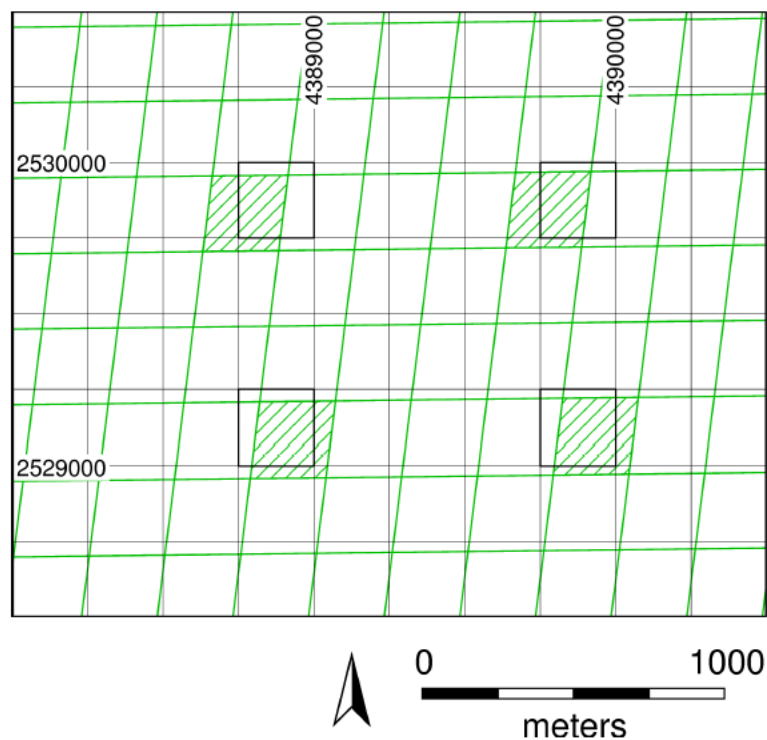

**Table S1.** Principal components extracted from four climatic parameters representing long-term annual averages. The first two extracted principal components which explained more than 95% of variance of the original set were used for further analysis.

|     | Precipitation | Average Temperature | Minimum Temperature | Temperature Range | Eigenvalue | Percent Importance |
|-----|---------------|---------------------|---------------------|-------------------|------------|--------------------|
| PC1 | 0.26          | −0.61               | −0.63               | 0.41              | 2.46       | 62.00              |
| PC2 | −0.75         | 0.18                | −0.08               | 0.63              | 1.36       | 34.00              |
| PC3 | 0.60          | 0.50                | 0.15                | 0.60              | 0.17       | 4.00               |
| PC4 | 0.01          | −0.59               | 0.76                | 0.29              | 0.00       | 0.00               |
